# Supplementary material for: Prognostic Significance of Serum Cholinesterase Level in Patients With Acute Decompensated Heart Failure With Preserved Ejection Fraction: Insights From the PURSUIT‐HFpEF Registry
Source: PubMed Central journal article supplement — J Am Heart Assoc. 2019 Dec 18;9(1):e014100. doi: 10.1161/JAHA.119.014100 (PMC6988145; doi:10.1161/jaha.119.014100), 2019-12-18
Supplement: JAH3-9-e014100-s001.pdf [file JAH3-9-e014100-s001.pdf]

# **SUPPLEMENTAL MATERIAL**

## **The OCVC-Heart Failure Investigators**

Chair: Yasushi Sakata, Department of Cardiovascular Medicine, Osaka University Graduate School of Medicine, 2-2 Yamada-oka, Suita 565-0871, Japan

Secretariats: Shungo Hikoso (Chief), Daisaku Nakatani, Hiroya Mizuno, Shinichiro Suna, Katsuki Okada, Tomoharu Dohi, Takayuki Kojima, Akihiro Sunaga, Hirota Kida, Oeun Bolrathanak and Sugako Mitsuoka, Department of Cardiovascular Medicine, Osaka University Graduate School of Medicine, Suita, Japan.

Investigators:

Shunsuke Tamaki, Masatake Fukunami, and Takahisa Yamada, Osaka General Medical Center, Osaka, Japan; Takaharu Hayashi and Yoshiharu Higuchi, Osaka Police Hospital, Osaka, Japan; Masaharu Masuda, Mitsutoshi Asai, and Toshiaki Mano, Kansai Rosai Hospital, Amagasaki, Japan; Hisakazu Fuji, Kobe Ekisaikai Hospital, Kobe, Japan; Yoshihiro Takeda, Yoshiyuki Nagai, and

Shizuya Yamashita, Rinku General Medical Center, Izumisano, Japan; Yusuke Nakagawa and Shuichi Nozaki, Kawanishi City Hospital, Kawanishi, Japan; Haruhiko Abe, Yasunori Ueda, Masaaki Uematsu, and Yukihiro Koretsune, National Hospital Organization Osaka National Hospital, Osaka, Japan; Kunihiro Nagai, Ikeda Municipal Hospital, Ikeda, Japan; Masamichi Yano, Masami Nishino, and Jun Tanouchi, Osaka Rosai Hospital, Sakai, Japan; Yoh Arita and Shinji Hasegawa, Japan Community Health Care Organization Osaka Hospital, Osaka, Japan; Takamaru Ishizu, Minoru Ichikawa and Yuzuru Takano Higashiosaka City Medical Center, Higashiosaka, Japan; Eisai Rin, Kawachi General Hospital, Higashiosaka, Japan; Tetsuya Watanabe and Shiro Hoshida, Yao Municipal Hospital, Yao, Japan; Masahiro Izumi, Kinki Central Hospital, Itami, Japan; Hiroyoshi Yamamoto and Hiroyasu Kato, Japan Community Health Care Organization, Osaka Minato Central Hospital, Osaka, Japan; Kazuhiro Nakatani and Hisatoyo Hiraoka, Sumitomo Hospital, Osaka, Japan; Mayu Nishio and Keiji Hirooka, Saiseikai Senri Hospital, Suita, Japan; Takahiro Yoshimura and Yoshinori Yasuoka, National Hospital Organization Osaka Minami Medical Center, Kawachinagano, Japan; Akihiro Tani, Kano General Hospital, Osaka, Japan; Yasushi Okumoto and Hideharu Akagi, Kinan Hospital,

Tanabe, Japan; Yasunaka Makino, Hyogo Prefectural Nishinomiya Hospital,  
Nishinomiya, Japan; Toshinari Ohnishi and Katsuomi Iwakura, Sakurabashi  
Watanabe Hospital, Osaka, Japan; Nagahiro Nishikawa and Yoshiyuki Kijima,  
Japan Community Health Care Organization, Hoshigaoka Medical Center,  
Hirakata, Japan; Takashi Kitao and Hideyuki Kanai, Minoh City Hospital, Minoh,  
Japan; Wataru Shioyama and Masashi Fujita, Osaka International Cancer  
Institute, Osaka, Japan; Koichiro Harada, Suita Municipal Hospital, Suita,  
Japan; Masahiro Kumada and Osamu Nakagawa, Toyonaka Municipal Hospital,  
Toyonaka, Japan; Ryo Araki and Takayuki Yamada, Otemae Hospital, Osaka,  
Japan; Akito Nakagawa and Yoshio Yasumura, Amagasaki Chuo Hospital,  
Amagasaki, Japan; Fusako Sera, Kei Nakamoto, Hidetaka Kioka, Tomohito  
Ohtani, Katsuki Okada, Hiroya Mizuno, Tomoharu Dohi, Takayuki Kojima, Hirota  
Kida, Sunaga Akihiro, Oeun Bolrathanak, Shinichiro Suna, Daisaku Nakatani,  
Shungo Hikoso, Toshihiro Takeda, Yasushi Matsumura, and Yasushi Sakata,  
Osaka University Graduate School of Medicine, Suita, Japan.
